# Supplementary material for: Soil carbon, nitrogen and phosphorus stoichiometry (C : N : P) in relation to conifer species productivity and nutrition across British Columbia perhumid rainforests
Source: Copernicus journal article supplement (doi:10.5194/bg-2019-401), 2019-10-23
Supplement: Supplementary file 1 [file bg-2019-401-supplement.pdf]

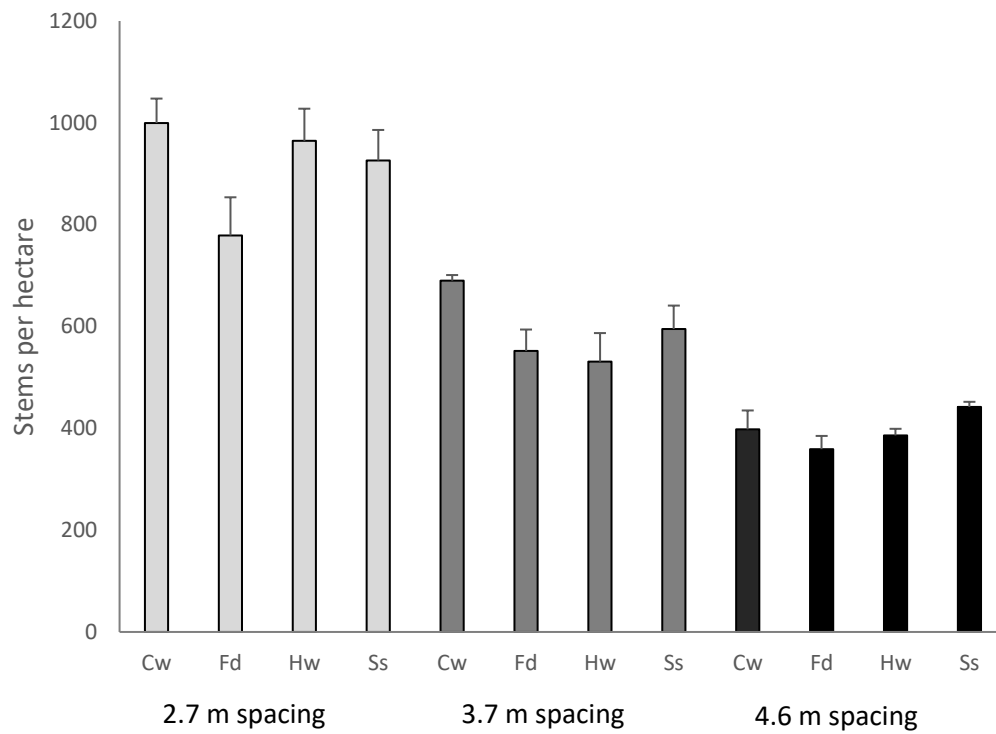

Figure S1. Average stems per ha of the four conifer species by planting density treatment in 2014 (52 years in age). Western redcedar = Cw; Douglas-fir = Fd; western hemlock = Hw; Sitka spruce = Ss (SE as error bars).
